# Supplementary material for: Synthesis and visible light photoactivity of anatase Ag and garlic loaded TiO2 nanocrystalline catalyst
Source: Royal Society of Chemistry journal article supplement (doi:10.1039/c2ra00790h), 2012-01-01

# **Synthesis and visible light photoactivity of anatase Ag and garlic loaded TiO<sub>2</sub> nanocrystalline catalyst**

**Jurate Virkutyte and Rajender S. Varma\***

1) 3 Equations

2) 2 Tables

3) 1 Figure

### Power rate law calculations

$$-\frac{d[A]}{dt} = k[A] \quad (1)$$

This equation may be further integrated to:

$$-\ln\left(\frac{A}{A_0}\right) = kt \quad (2)$$

$$[A] = [A]_0 e^{-kt} \quad (3)$$

where  $A_0$  is the initial MO concentration (ppm),  $A$  is the concentration after time ( $t$ , min) and  $k$  is the pseudo-first order reaction rate constant ( $\text{min}^{-1}$ ).

### BET surface area and porosity

Table SI 1. BET surface area, pore volume and pore size of Degussa P25 and doped  $\text{TiO}_2$  samples

|                               | BET surface area ( $\text{m}^2 \text{g}^{-1}$ ) | Pore Volume ( $\text{cm}^3 \text{g}^{-1}$ ) | Pore size (nm) |
|-------------------------------|-------------------------------------------------|---------------------------------------------|----------------|
| Degussa P25                   | 56                                              | 0.25                                        | 17.5           |
| S- $\text{TiO}_2$ (450 °C)    | 170                                             | 0.2                                         | 2.3            |
| Ag/S- $\text{TiO}_2$ (450 °C) | 45.9                                            | 0.16                                        | 7.2            |
| Ag/S- $\text{TiO}_2$ (700 °C) | 44.8                                            | 0.16                                        | 7.5            |

## XPS analysis

Table SI 2: Results of curve fitting of the XPS spectra for the C 1s, O 1s, Ti 2p, Ag 3d and S 2p regions

| Sample                | C % | O %  | Ti % | Ag % | S % |
|-----------------------|-----|------|------|------|-----|
| S-TiO <sub>2</sub>    | 5.5 | 68.8 | 22.5 | ---  | 4.4 |
| Ag/S-TiO <sub>2</sub> | 7.1 | 66.7 | 24.9 | 1.2  | 1.8 |

## XPS spectra

Figure SI 1. High resolution XPS spectra of each region in samples calcined at 450° C (as BE of both, S/C and Ag, S/C codoped TiO<sub>2</sub> nanocatalysts were similar, only representative S 2p, Ti 2p, O 1s, C 1s and Ag 3d are given below).

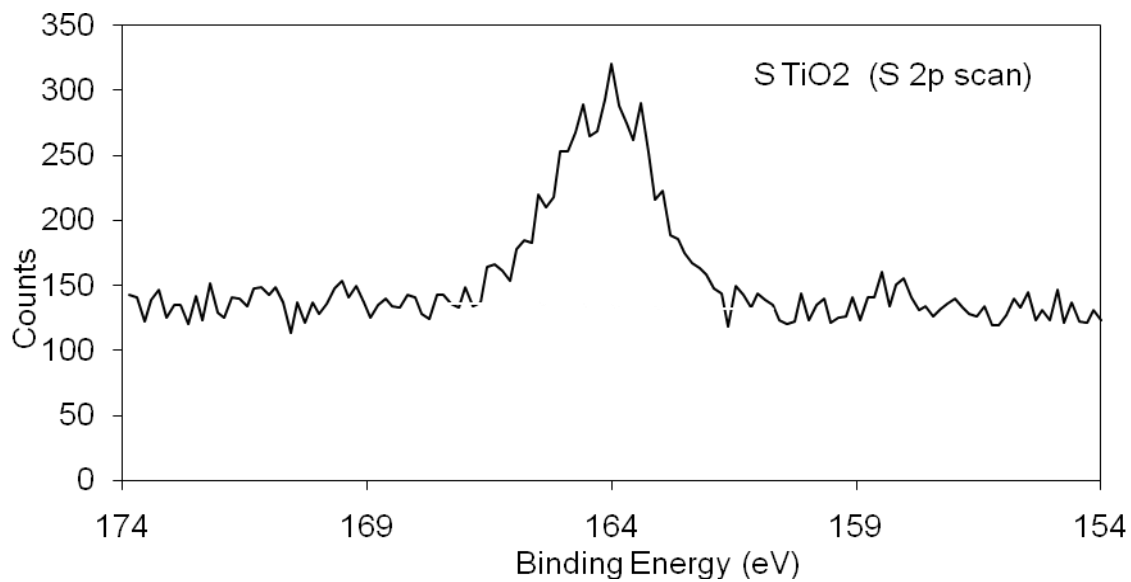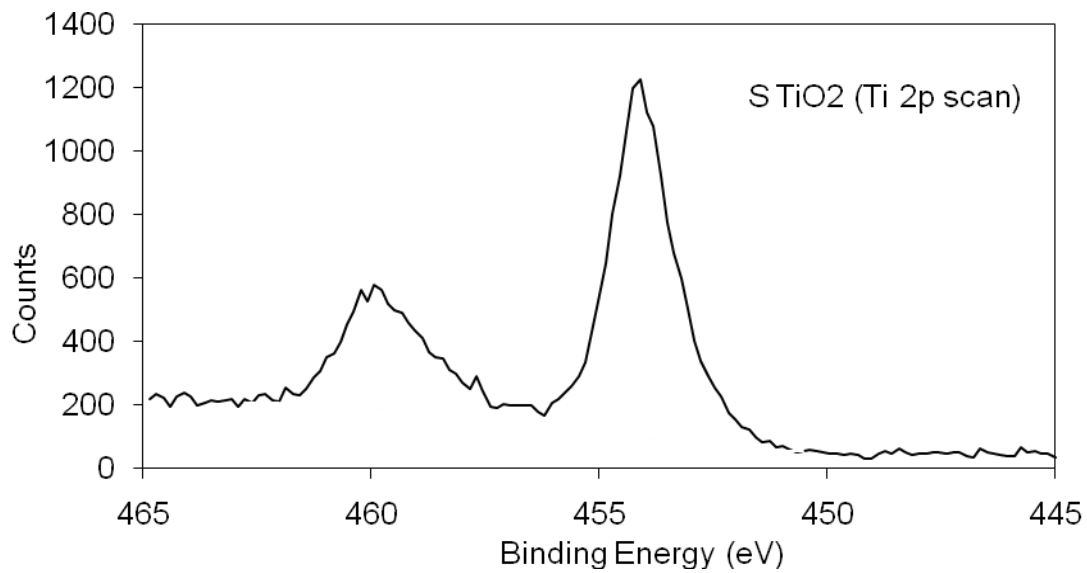

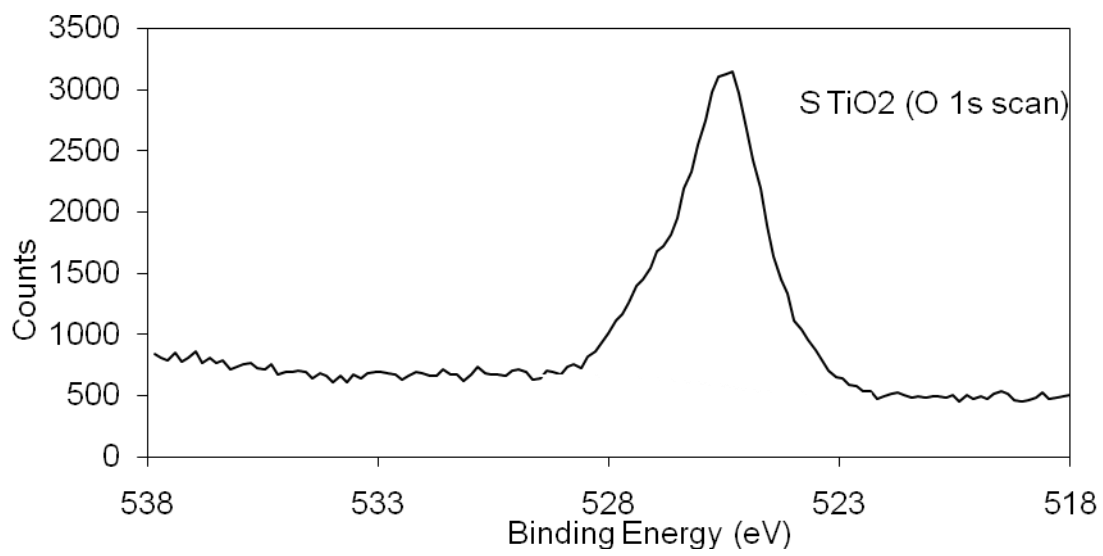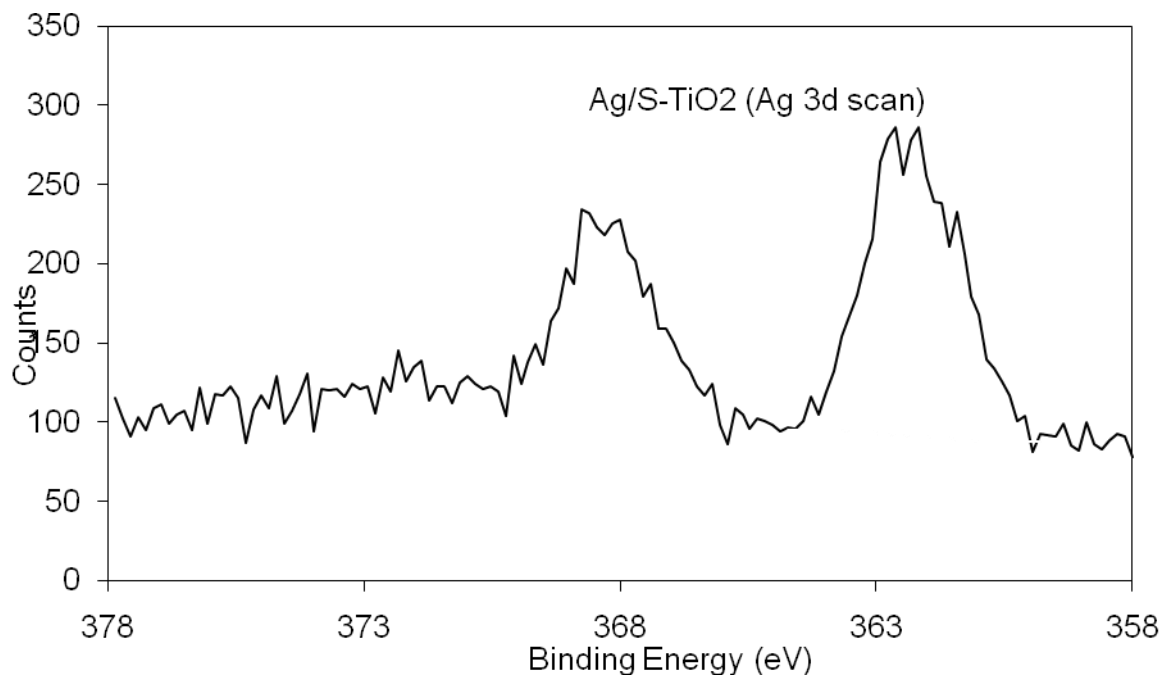

Supplement: c2ra00790h.pdf [file c2ra00790h.pdf]
